# Supplementary material for: Survival of the Curviest: Noise-Driven Selection for Synergistic Epistasis
Source: PLOS journal article supplement (doi:10.1371/journal.pgen.1006003), 2016-04-28

Phenotypic Noise Type:

- Developmental
- Developmental + Environmental
- Environmental

$$\sigma_{\mu} = \sigma_{\text{dev}} + \sigma_{\text{env}} = 0.1$$

$$\sigma_{\mu} = \sigma_{\text{dev}} + \sigma_{\text{env}} = 1.0$$

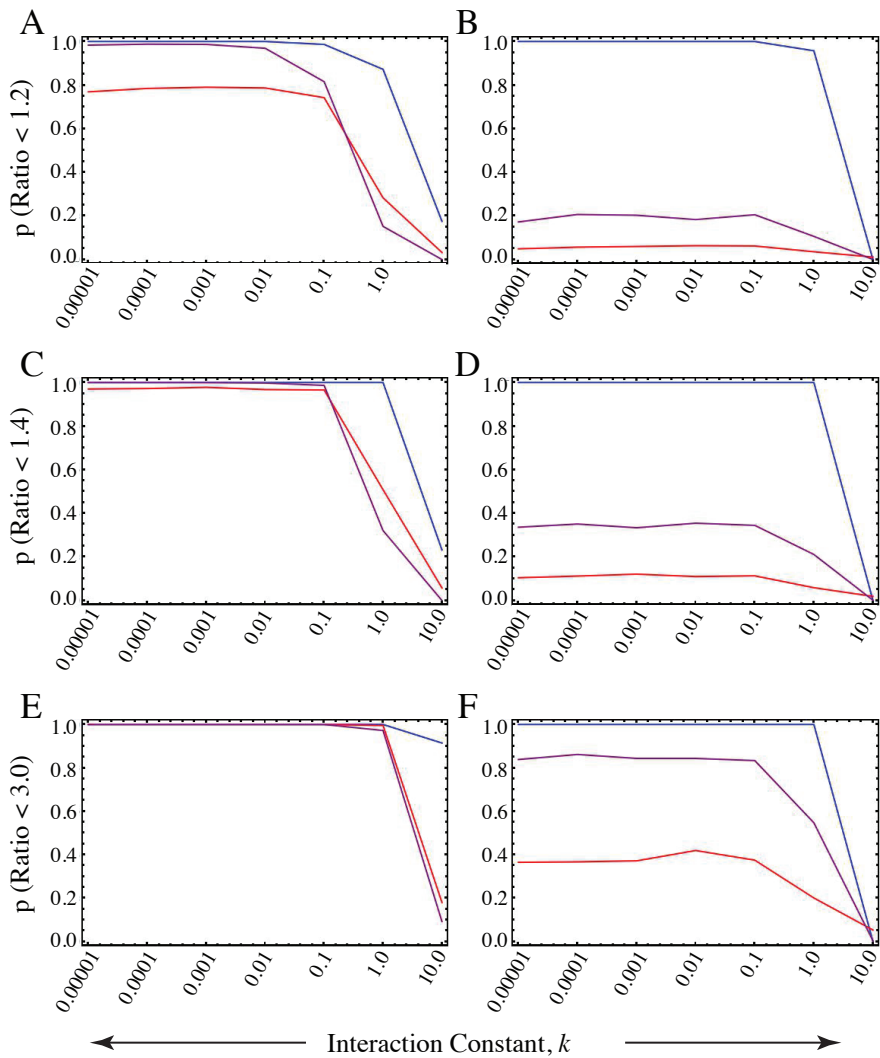

Supplement: S4 (10.1371/journal.pgen.1006003.s004) [file journal.pgen.1006003.s004]
