# Supplementary material for: Survival of the Curviest: Noise-Driven Selection for Synergistic Epistasis
Source: PLOS journal article supplement (doi:10.1371/journal.pgen.1006003), 2016-04-28

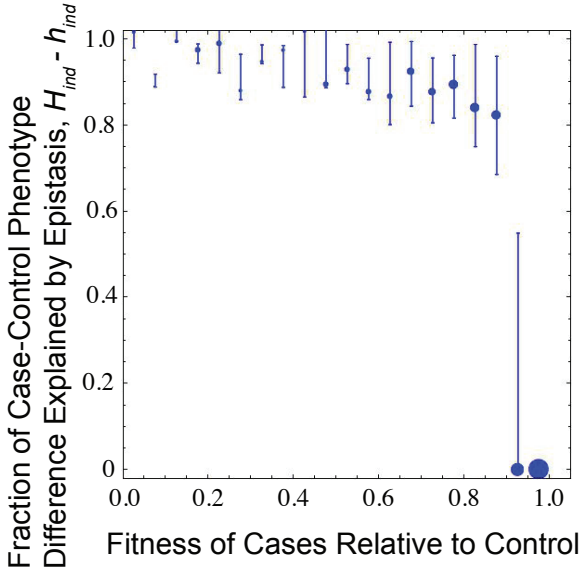

Supplement: S7 (10.1371/journal.pgen.1006003.s007) [file journal.pgen.1006003.s007]
